# Supplementary material for: Hypoxia inducible factor 1α in vascular smooth muscle cells promotes angiotensin II-induced vascular remodeling via activation of CCL7-mediated macrophage recruitment
Source: PubMed Central journal article supplement (PMC6639417; doi:10.1038/s41419-019-1757-0), 2019-07-18
Supplement: 41419_2019_1757_MOESM1_ESM.pdf [file 41419_2019_1757_MOESM1_ESM.pdf]

## Supplementary figures

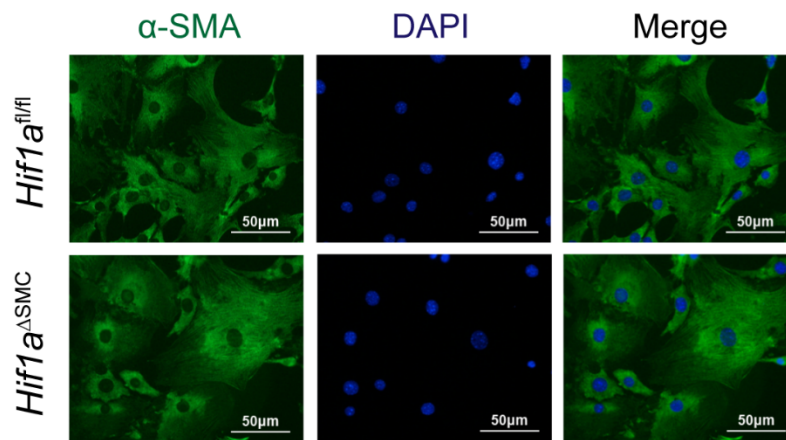

**Supplementary Fig. 1. Purity identification of VSMCs.** Immunofluorescence staining was used to detect the expression of  $\alpha$ -SMA, a specific marker of smooth muscle cells, in primary cultured VSMCs of  $Hif1a^{fl/fl}$  and  $Hif1a^{\Delta SMC}$  mice.
