# Supplementary material for: Hypoxia inducible factor 1α in vascular smooth muscle cells promotes angiotensin II-induced vascular remodeling via activation of CCL7-mediated macrophage recruitment
Source: PubMed Central journal article supplement (PMC6639417; doi:10.1038/s41419-019-1757-0), 2019-07-18
Supplement: 41419_2019_1757_MOESM2_ESM.pdf [file 41419_2019_1757_MOESM2_ESM.pdf]

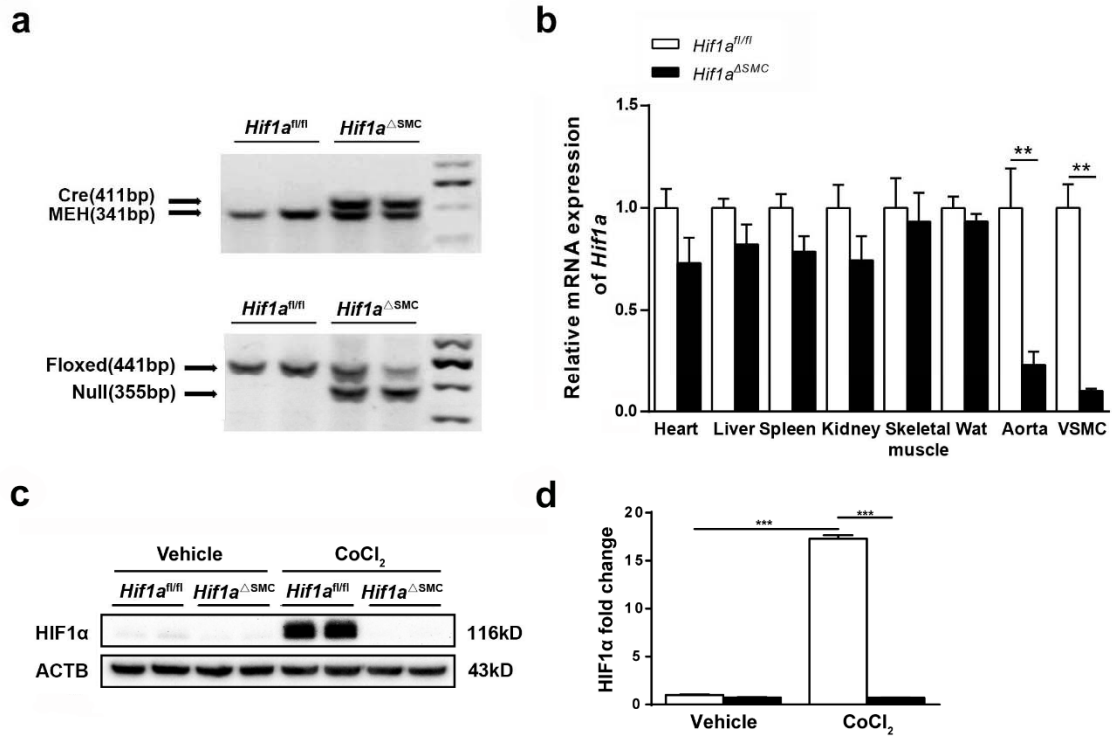

**Supplementary Fig. 2. Identification of VSMC-specific HIF1 $\alpha$ -deficient mice. a** Polymerase chain reaction (PCR) analysis showed the *Hif1a* and *Cre* genes and loxP sites in DNA extracted from *Hif1a<sup>fl/fl</sup>* and *Hif1a<sup>ΔSMC</sup>* mouse tails. **b** *Hif1a* mRNA expression in mouse tissues and VSMCs. \*\* $P < 0.01$ ,  $n = 6$  per group. **c** western blotting analysis of HIF1 $\alpha$  protein in VSMCs treated with 150  $\mu\text{M}$  CoCl<sub>2</sub> for 6 hours and quantification **d**. \*\*\* $P < 0.001$ ,  $n = 3$  (independent experiments), statistical significance was determined by the unpaired t test.
