# Supplementary material for: Hypoxia inducible factor 1α in vascular smooth muscle cells promotes angiotensin II-induced vascular remodeling via activation of CCL7-mediated macrophage recruitment
Source: PubMed Central journal article supplement (PMC6639417; doi:10.1038/s41419-019-1757-0), 2019-07-18
Supplement: 41419_2019_1757_MOESM3_ESM.pdf [file 41419_2019_1757_MOESM3_ESM.pdf]

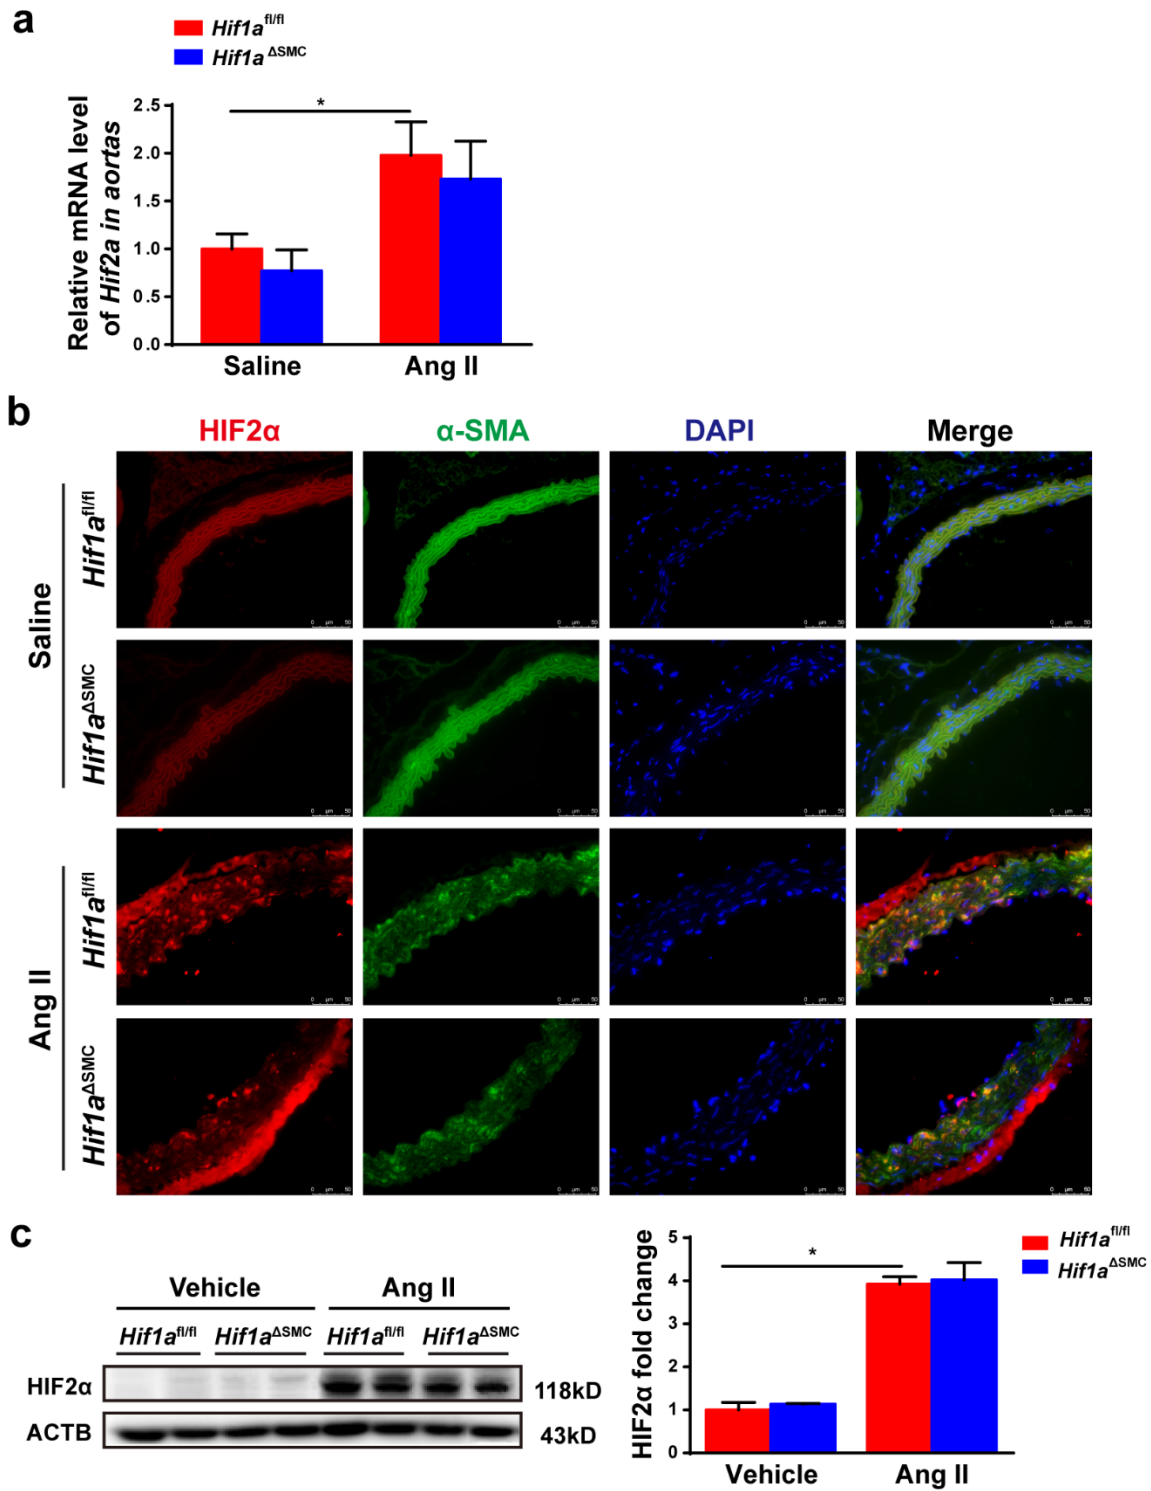

**Supplementary Fig. 3. Deficiency of HIF1 $\alpha$  in VSMCs does not affect Ang II-induced HIF2 $\alpha$  expression in aortas.** *Hif1a<sup>fl/fl</sup>* and *Hif1a<sup>ΔSMC</sup>* mice were infused with saline or 1000 ng/kg/min Ang II for 28 days. **a** *Hif2a* mRNA level in aortas were measured by qPCR. \* $P < 0.05$ ,  $n = 6$  per group. **b** Immunofluorescent staining for HIF2 $\alpha$  (in red) and  $\alpha$ -SMA (in green) with DAPI counterstaining (in blue) in aortic sections from saline or Ang II-infused *Hif1a<sup>fl/fl</sup>* and *Hif1a<sup>ΔSMC</sup>* mice. **c** *Hif1a<sup>fl/fl</sup>* and *Hif1a<sup>ΔSMC</sup>* VSMCs were treated with vehicle or Ang II (1  $\mu$ M) for 24 hours and HIF2 $\alpha$  protein level was detected by Western blot. \* $p < 0.05$ ,  $n = 3$  per group.
