# Supplementary material for: Hypoxia inducible factor 1α in vascular smooth muscle cells promotes angiotensin II-induced vascular remodeling via activation of CCL7-mediated macrophage recruitment
Source: PubMed Central journal article supplement (PMC6639417; doi:10.1038/s41419-019-1757-0), 2019-07-18
Supplement: 41419_2019_1757_MOESM4_ESM.pdf [file 41419_2019_1757_MOESM4_ESM.pdf]

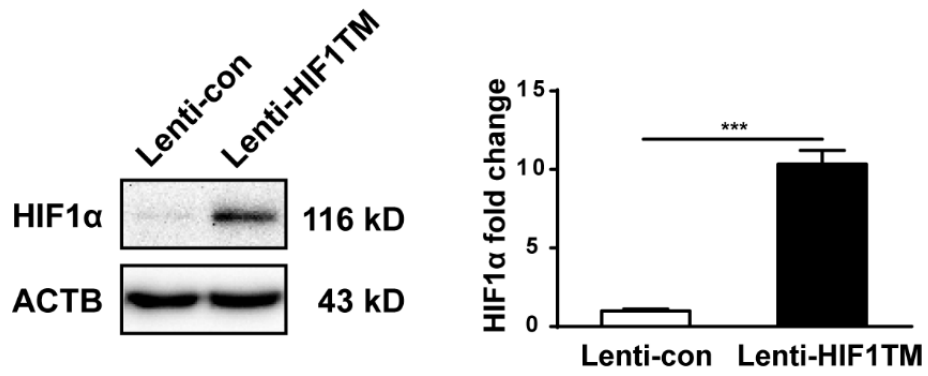

**Supplementary Fig. 4. Overexpression of HIF1 $\alpha$  in VSMCs by lenti-virus.** Western blotting analysis of HIF1 $\alpha$  protein in VSMCs infected with lentivirus expressing oxygen-stable HIF1 $\alpha$  (Lenti-HIF1TM) for 24 hours and quantification.
