# Supplementary material for: Hypoxia inducible factor 1α in vascular smooth muscle cells promotes angiotensin II-induced vascular remodeling via activation of CCL7-mediated macrophage recruitment
Source: PubMed Central journal article supplement (PMC6639417; doi:10.1038/s41419-019-1757-0), 2019-07-18
Supplement: 41419_2019_1757_MOESM5_ESM.pdf [file 41419_2019_1757_MOESM5_ESM.pdf]

**Supplementary Table 1. Primer list**

| <b>qPCR</b>               | <b>Primer Sequence (5'-3')</b>                         |
|---------------------------|--------------------------------------------------------|
| <i>Il1b</i>               | F: TGTGAAATGCCACCTTTTGA<br>R: GGTCAAAGGTTTGGGAAGCAG    |
| <i>Il6</i>                | F: ACCAGAGGAAATTTTCAATAGGC<br>R: TGATGCACTTGCAGAAAACA  |
| <i>Tnfa</i>               | F: AGGGTCTGGGCCATAGAACT<br>R: CCACCACGCTCTTCTGTCTAC    |
| <i>Mcp1</i>               | F: CCTGCTGTTCACAGTTGCC<br>R: ATTGGGATCATCTTGCTGGT      |
| <i>Hif1a</i>              | F: ATAGCTTCGCAGAATGCTCAGA<br>R: CAGTCACCTGGTTGCTGCAA   |
| <i>Hif2a</i>              | F: TGAGTTGGCTCATGAGTTGCC<br>R: GGAGCTTATGTGTCCGAAGGA   |
| <i>Actb</i>               | F: ATGGAGGGGAATACAGCCC<br>R: TTCTTTGCAGCTCCTTCGTT      |
| <i>Cxcl10</i>             | F: ATGACGGGCCAGTGAGAATG<br>R: TCGTGGCAATGATCTCAACAC    |
| <i>Cxcl5</i>              | F: AGCTGCGTTGTGTTTGCTTA<br>R: CAGTTTAGCTATGACTTCCACCG  |
| <i>Cxcl14</i>             | F: GTGGACGGGTCCAAGTGTA<br>R: CCTCGCAGTGTGGGTACTTT      |
| <i>Ccl7</i>               | F: CCCTGGGAAGCTGTTATCTTCAA<br>R: CTCGACCCACTTCTGATGGG  |
| <i>Ccl1</i>               | F: ACCATGAAACCCACTGCCAT<br>R: GTAAGCATGCTCTTGCTGTCAA   |
| <i>Ccl24</i>              | F: CAAGGCAGGGGTCATCTTCA<br>R: ATGTGCCTCTGAACCCACAG     |
| <i>Ccl26</i>              | F: GCTATGTCCTGCTGCCCTAA<br>R: TAAAGAATATCACACCGTCACTGG |
| <i>Cxcr3</i>              | F: CCCAACCACAAGTGCCAAAG<br>R: TACTAACCTCAAGGTACATGGC   |
| <b>Genotyping<br/>PCR</b> |                                                        |

|                               |                                                                                                                        |
|-------------------------------|------------------------------------------------------------------------------------------------------------------------|
| <i>Hif1a</i> <sup>fl/fl</sup> | H1: CTGTCTTCCCTGCTTAGGTCTTTCTAAC<br>H2: GAGATGGAGAAGGAGGTTAGTGTATCC<br>H3: ACGTTGGCTCATGGTGTACTTTG                     |
| CRE                           | A: GCGGTCTGGCAGTAAAACTATC<br>B: GTGAAACAGCATTGCTGTCACTT<br>C: CTAGGCCACAGAATTGAAAGATCT<br>D: GTAGGTGGAAATTCTAGCATCATCC |
| <b>ChIP PCR</b>               |                                                                                                                        |
| HRE1                          | F: CCTATTTCCACCTTTGTCTGCTA<br>R: CATTCCACATTGCCAGTCTTTG                                                                |
| HRE2                          | F: GGCAGTTGCTCAAACATAGTG<br>R: TCCCAGAAATATTGTCCAGAAGG                                                                 |
| HRE3                          | F: AACATGTCTGCGGGTACTT<br>R: CCCAAAGCATTCTTTCCAAGTC                                                                    |
